# Supplementary material for: Understanding the Experiences of Fulbright Visiting Scholars—A Qualitative Systematic Review
Source: MDPI journal article supplement (doi:10.3390/educsci12020090), 2022-01-28
Supplement: s1 [file s1]

## Supplementary Materials

**Table S1:** Search Strategy

| Stage of Search             | Details                                                                                                                                                                                                                                                                                                                                                                                                                                                                                                                                                                                                                                                                                                                                                                                                                                                                                                                                                                                                                                                                                                                                                 |
|-----------------------------|---------------------------------------------------------------------------------------------------------------------------------------------------------------------------------------------------------------------------------------------------------------------------------------------------------------------------------------------------------------------------------------------------------------------------------------------------------------------------------------------------------------------------------------------------------------------------------------------------------------------------------------------------------------------------------------------------------------------------------------------------------------------------------------------------------------------------------------------------------------------------------------------------------------------------------------------------------------------------------------------------------------------------------------------------------------------------------------------------------------------------------------------------------|
| Databases                   | <p>Search Terms: ("visiting scholar" OR "visiting scholars") AND (experience OR experiences) AND "United States" AND "Fulbright Program"</p> <p>Records identified from databases (n = 406)</p> <ul style="list-style-type: none"> <li>• Google Scholar (n=380)</li> <li>• Education Source (n=0)</li> <li>• ProQuest Education Journals (n=26)</li> </ul>                                                                                                                                                                                                                                                                                                                                                                                                                                                                                                                                                                                                                                                                                                                                                                                              |
| Remove Duplicates           | <p>Records removed before screening:</p> <ul style="list-style-type: none"> <li>• Duplicate records removed (n = 14)</li> <li>• Records marked as ineligible by automation tools (n=0)</li> <li>• Records removed for other reasons (n=0)</li> </ul> <p>Records screened (n = 392)</p>                                                                                                                                                                                                                                                                                                                                                                                                                                                                                                                                                                                                                                                                                                                                                                                                                                                                  |
| Screening Title             | <p>109 removed after screening title (283 remaining)</p> <ul style="list-style-type: none"> <li>• 47 are not peer-reviewed articles, dissertations, or theses</li> <li>• 4 are about U.S. Fulbrighters (not visiting scholars to the U.S.)</li> <li>• 56 are about an unrelated topic (not education or Fulbright)</li> <li>• 2 are in a non-English language</li> </ul>                                                                                                                                                                                                                                                                                                                                                                                                                                                                                                                                                                                                                                                                                                                                                                                |
| Screening Abstract          | <p>260 removed after screening abstract (23 articles remaining)</p> <ul style="list-style-type: none"> <li>• 133 are not peer-review articles, dissertations, or theses</li> <li>• 14 are about U.S. Fulbrighters (not visiting scholars to the U.S.)</li> <li>• 105 are about an unrelated topic (not education or Fulbright)</li> <li>• 4 Full text not available</li> <li>• 3 are Fulbright funded but are not research articles about Fulbright</li> <li>• 1 is in a non-English language</li> </ul>                                                                                                                                                                                                                                                                                                                                                                                                                                                                                                                                                                                                                                                |
| Screening Full Text         | <p>9 removed after screening full text (14 articles remaining)</p> <ul style="list-style-type: none"> <li>• 3 are about U.S. Fulbrighters</li> <li>• 4 are not peer-reviewed articles, dissertations, or theses</li> <li>• 2 are quantitative studies</li> </ul>                                                                                                                                                                                                                                                                                                                                                                                                                                                                                                                                                                                                                                                                                                                                                                                                                                                                                        |
| Examples of Removed Records | <ul style="list-style-type: none"> <li>• Not peer-reviewed articles, dissertations, or theses: Terranova, C.N., &amp; Tromble, M. (2017). <i>The Routledge Companion to Biology in Art and Architecture</i>. Routledge. [1]</li> <li>• Focus on U.S. Fulbrighters: Cline, C. D. (2017). <i>Understanding the Lived Experiences of Expatriate Educators in Postsecondary Education in China</i> (Order No. 10600253). Available from ProQuest Dissertations &amp; Theses Global; Social Science Premium Collection. (1966715111). [2]</li> <li>• Unrelated topic: Hoyt, W.H. (2020). 50 Years Celebrating Earth, Atmosphere, Astronomy, and Oceans: Stories of a Great Department.(2020). <i>Earth &amp; Atmospheric Sciences Faculty Publications</i>. 2. <a href="https://digscholarship.unco.edu/easfacpub/2">https://digscholarship.unco.edu/easfacpub/2</a> [3]</li> <li>• Non-English language: Dehshiri, M.R. &amp; Taheri, M. (2016). The Role of Higher Education in US Cultural Diplomacy: Emphasis on Performance in Iran. <i>Political Science Quarterly (Scientific Research of Islamic Azad University)</i>, 12(36), 61-98. [4]</li> </ul> |

**Table S2:** Articles included in the systematic review

| Author                                                                       | Title                                                                                                                                                               | Participants<br>' Home<br>Countries | Year | Article Type          | Research Design                                | Number<br>of<br>Citation<br>s |
|------------------------------------------------------------------------------|---------------------------------------------------------------------------------------------------------------------------------------------------------------------|-------------------------------------|------|-----------------------|------------------------------------------------|-------------------------------|
| Alexey,<br>Malikov                                                           | External academic mobility of faculty in one regional university in Kazakhstan: challenges and opportunities [5]                                                    | Kazakhstan                          | 2014 | PhD Dissertation      | Qualitative (Interviews)                       | 0                             |
| Bettie,<br>Molly                                                             | The Scholar as Diplomat: The Fulbright Program and America's Cultural Engagement with the World [6]                                                                 | Multiple                            | 2015 | Peer-reviewed article | Historical (Archival sources, oral histories)  | 0                             |
| Cheddadi,<br>Saoussen<br>Nour El<br>Imen                                     | The Fulbright Program in Algeria (2008-2016): Higher Education, Soft Power, and Transnational Intellectual Subjects [7]                                             | Algeria                             | 2018 | PhD Dissertation      | Qualitative (Interviews)                       | 0                             |
| Eddy,<br>Pamela L.                                                           | Faculty as Border Crossers: A Study of Fulbright Faculty [8]                                                                                                        | Ireland                             | 2014 | Peer-reviewed article | Qualitative (Interviews)                       | 13                            |
| Fu,<br>Meirong                                                               | The Fulbright Experience of Visiting Scholars from Post-Communist China: A Qualitative Study and a Critical Evaluation [9]                                          | China                               | 2018 | Peer-reviewed article | Qualitative (Interviews)                       | 2                             |
| Leite,<br>Marcelo da<br>Silva; Gaia,<br>Celeste                              | Cross-culture outcomes of a Brazilian professor Fulbright in the USA [10]                                                                                           | Brazil                              | 2017 | Peer-reviewed article | Qualitative (Interviews/Reflexivity Statement) | 0                             |
| Nguyen,<br>Bao Q.                                                            | Internationalization at Jesuit colleges and universities in the United States: Tensions between the Jesuit mission and internationalization in strategic plans [11] | Multiple                            | 2018 | PhD Dissertation      | Qualitative (Case Studies)                     | 2                             |
| Pereira,<br>Bruno<br>Alves;<br>Dionísio,<br>Cynthia<br>Israelly<br>Barbalho; | The Fulbright Foreign Language Teaching Assistant Program (FLTA) e as políticas linguísticas para o ensino de português nos EUA [12]                                | Brazil                              | 2020 | Peer-reviewed article | Qualitative (Interviews)                       | 0                             |

|                                                                                               |                                                                                                                                                   |                                 |      |                              |                                                     |    |
|-----------------------------------------------------------------------------------------------|---------------------------------------------------------------------------------------------------------------------------------------------------|---------------------------------|------|------------------------------|-----------------------------------------------------|----|
| de Sousa,<br>Socorro<br>Cláudia<br>Tavares                                                    |                                                                                                                                                   |                                 |      |                              |                                                     |    |
| Priem, Ian<br>Sean                                                                            | Exchange or Empire?<br>The Fulbright Program<br>in the Netherlands<br>during the Cold War,<br>1949-1990 [13]                                      | The<br>Netherlands              | 2014 | Master's<br>Thesis           | Historical<br>(Archival sources,<br>oral histories) | 0  |
| Robbins,<br>Elizabeth<br>M.                                                                   | From enemies to friends:<br>The improvement of<br>U.S.-Vietnam relations<br>through educational<br>exchanges, 1992-2013<br>[14]                   | Vietnam                         | 2013 | PhD<br>Dissertation          | Historical<br>(Archival sources,<br>oral histories) | 2  |
| Touhy,<br>Theris A.;<br>Kydd,<br>Angela;<br>Fagerberg,<br>Ingegerd;<br>Engstrom,<br>Gabriella | International<br>Collaboration in<br>Gerontological Nursing<br>[15]                                                                               |                                 | 2011 | Peer-<br>reviewed<br>article | Qualitative<br>(Interviews)                         | 0  |
| Witkowski<br>, Patricia;<br>Gibbes,<br>Ceria                                                  | Preparing faculty for<br>internationalization:<br>Opportunities through<br>teaching, research, and<br>service [16]                                |                                 | 2020 | Peer-<br>reviewed<br>article | Qualitative<br>(Interviews)                         | 0  |
| Xiangshun,<br>Ding                                                                            | From Reception to<br>Collaboration: A Study<br>of the Legal Education<br>Exchange between<br>China and the United<br>States Since the 1980 [17]   | China                           | 2013 | Peer-<br>reviewed<br>article | Historical<br>(Archival sources)                    | 1  |
| Zhuk,<br>Sergei I.                                                                            | "Academic Détente":<br>IREX Files, Academic<br>Reports, and<br>"American" Adventures<br>of Soviet Americanists<br>during the Brezhnev Era<br>[18] | Soviet<br>Union<br>(historical) | 2013 | Peer-<br>reviewed<br>article | Historical<br>(Archival sources,<br>oral histories) | 11 |

**Table S3:** Taguette Codebook

| <b>Code</b>                          | <b>Definition</b>                                                                                                                                                | <b>Number of times coded</b> |
|--------------------------------------|------------------------------------------------------------------------------------------------------------------------------------------------------------------|------------------------------|
| America (positive)                   | First round of coding - includes discussions of visiting scholars' positive attitudes or opinions toward the United States.                                      | 14                           |
| America (negative)                   | First round of coding - includes discussions of visiting scholars' negative attitudes or opinions toward the United States.                                      | 8                            |
| interesting                          | First round of coding - includes all parts of the study that are relevant to the analysis but do not fit into the other initial codes                            | 97                           |
| prestige                             | First round of coding - includes mentions of the Fulbright Program's prestige in relation to the visiting scholar's career development.                          | 3                            |
| Fulbright (negative)                 | First round of coding - includes discussions of visiting scholars' negative attitudes or opinions toward the Fulbright Program.                                  | 8                            |
| Fulbright (positive)                 | First round of coding - includes discussions of visiting scholars' positive attitudes or opinions toward the Fulbright Program.                                  | 5                            |
| specific country relationship        | First round of coding, second round coding, and final theme - includes mentions of visiting scholars' specific home country's relationship to the United States. | 19                           |
| bureaucracy at home                  | Second round coding Descriptions of bureaucratic structures in home country                                                                                      | 4                            |
| bureaucracy (U.S)                    | Second round coding - descriptions of bureaucracy in the United States                                                                                           | 6                            |
| American cultural values             | discussion of visiting scholars' perception of American cultural values                                                                                          | 22                           |
| research and professional engagement | Second round of coding, and final theme - mentions of opportunities for research and professional engagement with U.S. colleagues and students.                  | 28                           |
| cultural exchange                    | Second round of coding - mentions of cultural exchange between visiting scholar and U.S.                                                                         | 42                           |
| Contested attitudes                  | Final theme - Fulbright visiting scholars have contested attitudes toward the United States                                                                      | 37                           |

## References

1. Terranova, C.N.; Tromble, M. *The Routledge Companion to Biology in Art and Architecture*; Routledge: London, UK, 2017.
2. Cline, C.D. Understanding the Lived Experiences of Expatriate Educators in Postsecondary Education in China. Ph.D. Thesis, Azusa Pacific University: Azusa, CA, USA, 2017.
3. Hoyt, W.H. 50 Years Celebrating Earth, Atmosphere, Astronomy, and Oceans: Stories of a Great Department. *Earth Atmos. Sci. Fac. Publ.* **2020**, *2*, 1-70. <https://digscholarship.unco.edu/easfacpub/2>.
4. Dehshiri, M.R.; Taheri, M. The Role of Higher Education in US Cultural Diplomacy: Emphasis on Performance in Iran. *Political Sci. Q. (Sci. Res. Islamic Azad Univ.)* **2016**, *12*, 61–98.
5. Alexey, M. External Academic Mobility of Faculty in One Regional University in Kazakhstan: Challenges and Opportunities. Master's Thesis, Nazarbayev University, Nur-Sultan, Kazakhstan, 2014.
6. Bettie, M. The Scholar as Diplomat: The Fulbright Program and America's Cultural Engagement with the World. *Caliban Fr. J. Engl. Stud.* **2015**, *54*, 233–252. <https://doi.org/10.4000/caliban.3066>.
7. Cheddadi, S.N.E.I. The Fulbright Program in Algeria (2008–2016): Higher Education, Soft Power, and Transnational Intellectual Subjects. Ph.D. Thesis, University of Kansas, Lawrence, Kansas, 2018. Available online: <https://www.proquest.com/docview/227192702/abstract/5EE71735921843C4PQ/1> (accessed on 20 November 2021).
8. Eddy, P.L. Faculty as Border Crossers: A Study of Fulbright Faculty. *New Dir. High. Educ.* **2014**, *2014*, 19–30. <https://doi.org/10.1002/he.20080>.
9. Fu, M. The Fulbright Experience of Visiting Scholars from Post-Communist China: A Qualitative Study and a Critical Evaluation. *ASJ Occas. Pap.* **2018**, *15*, 1-27. Available online: <http://op.asjournal.org/the-fulbright-experience-of-visiting-scholars-from-post-communist-china-a-qualitative-study-and-a-critical-evaluation/> (accessed on 20 November 2021).
10. da Silva Leite, M.; Gaia, A.C. Cross-culture outcomes of a Brazilian professor Fulbright in the USA. *Rev. De EDUCAÇÃO Do Cogeime* **2017**, *26*, 115–123.
11. Nguyen, B.Q. Internationalization at Jesuit Colleges and Universities in the United States: Tensions Between the Jesuit Mission and Internationalization in Strategic Plans. Ph.D. Thesis, Boston College, Boston, MA, USA, 2018.
12. Pereira, B.A.; Dionísio, C.I.B.; de Sousa, S.C.T. The Fulbright Foreign Language Teaching Assistant Program (FLTA) and the language policies for teaching Portuguese in the USA. *Rev. Let. Raras* **2020**, *9*. <https://doi.org/10.35572/rlr.v9i4.1931>.
13. Priem, I.S. Exchange or Empire? The Fulbright Program in the Netherlands during the Cold War, 1949–1990. Master's Thesis, Erasmus University Rotterdam, Rotterdam, The Netherlands, 2014.
14. Robbins, E.M. From Enemies to Friends: The Improvement of U.S.-Vietnam Relations through Educational Exchanges, 1992–2013. Master's Thesis, Georgetown University, Washington, DC, USA, 2013. Available online: <https://www.proquest.com/docview/1351136776/abstract/5110209D024B4430PQ/1> (accessed on 20 November 2021).
15. Touhy, T.A.; Kydd, A.; Fagerberg, I.; Engstrom, G. International Collaboration in Gerontological Nursing. *J. Gerontol. Nurs.* **2011**, *37*, 3–4. <https://doi.org/10.3928/00989134-20110203-99>.
16. Witkowsky, P.; Gibbes, C. Preparing faculty for internationalization: Opportunities through teaching, research, and service. *New Dir. High. Educ.* **2020**, *2020*, 73–84. <https://doi.org/10.1002/he.20393>.
17. Xiangshun, D. From Reception to Collaboration: A Study of the Legal Education Exchange between China and the United States Since the 1980s. *China Leg. Sci.* **2013**, *1*, 52–77.
18. Zhuk, S.I. "Academic Détente": IREX Files, Academic Reports, and "American" Adventures of Soviet Americanists during the Brezhnev Era. *Cah. Du Monde Russe* **2013**, *54*, 297–328. <https://doi.org/10.4000/monderusse.7943>.
